# Supplementary material for: A single domain antibody fragment that recognizes the adaptor ASC defines the role of ASC domains in inflammasome assembly
Source: PubMed Central journal article supplement — J Exp Med. 2016 May 2;213(5):771–90. doi: 10.1084/jem.20151790 (PMC4854733; doi:10.1084/jem.20151790), 2016-05-02
Supplement: supp_jem.20151790_JEM_20151790_sm.pdf [file supp_jem.20151790_JEM_20151790_sm.pdf]

SUPPLEMENTAL MATERIAL

Schmidt et al., <http://www.jem.org/cgi/content/full/jem.20151790/DC1>

Table S1. Crystallographic data collection statistics

| Crystals               | VHH <sub>ASC</sub>               | VHH <sub>ASC</sub> + ASC <sup>CARD</sup> mutant |
|------------------------|----------------------------------|-------------------------------------------------|
| <b>Data collection</b> |                                  |                                                 |
| Beamlines              | APS 24-ID-C                      | APS 24-ID-C                                     |
| Space group            | P4 <sub>2</sub> 2 <sub>1</sub> 2 | P2                                              |
| <b>Cell dimensions</b> |                                  |                                                 |
| a, b, c (Å)            | 97.4, 97.4, 31.9                 | 53.6, 31.0, 79.2                                |
| α, β, γ (°)            | 90.0, 90.0, 90.0                 | 90.0, 90.0, 90.0                                |
| Resolution (Å)         | 68.9 - 1.9                       | 79.2 - 4.2                                      |
| CC(1/2) (%)            | 99.8 (98.6)                      | 73.6 (63.8)                                     |
| I/σ <sub>i</sub>       | 36.1 (13.7)                      | 2.1 (2.0)                                       |
| Multiplicity           | 9.4 (4.7)                        | 6.4 (6.7)                                       |
| Completeness (%)       | 99.2 (94.9)                      | 99.0 (100.0)                                    |

Numbers in parentheses are for the highest resolution shell.

Table S2. Crystallographic structure refinement statistics

| Structure determination                                 | Molecular replacement | Molecular replacement |
|---------------------------------------------------------|-----------------------|-----------------------|
| <b>Refinement</b>                                       |                       |                       |
| No. reflections                                         | 12,735                | 2,025                 |
| <i>R</i> <sub>work</sub> / <i>R</i> <sub>free</sub> (%) | 16.9/20.3             | 30.0/35.5             |
| No. atoms                                               | 988                   | 1,051                 |
| Protein                                                 | 861                   | 1,051                 |
| Water                                                   | 127                   | 0                     |
| Average B factor (Å <sup>2</sup> )                      | 28.0                  | 85.0                  |
| Protein (Å <sup>2</sup> )                               | 26.8                  | 85.0                  |
| Water (Å <sup>2</sup> )                                 | 37.4                  | —                     |
| <b>R.M.S. deviations</b>                                |                       |                       |
| Bond lengths (Å <sup>2</sup> )/angles (°)               | 0.006/0.97            | 0.004/1.15            |
| <b>Ramachandran plot</b>                                |                       |                       |
| Favored (%)                                             | 96.4                  | 96.0                  |
| Allowed (%)                                             | 3.6                   | 4.0                   |
